# Supplementary material for: A Chromosome-Length Assembly of the Hawaiian Monk Seal (Neomonachus schauinslandi): A History of “Genetic Purging” and Genomic Stability
Source: MDPI journal article supplement (doi:10.3390/genes13071270), 2022-07-18
Supplement: s1 [file s1]

genes-1789705

Supplementary Materials:

**Table S1. Methods used in this study and the order in which they were employed.**

| Method                 | Platform            | Input                                    | Data type               | Analysis tools                |
|------------------------|---------------------|------------------------------------------|-------------------------|-------------------------------|
| DISCOVAR               | Illumina HS2500     | 500ng sheared DNA sheared to ~400 bp     | 2X250 PE reads          | DISCOVAR <i>denovo</i> v52488 |
| 10X Genomics Chromium  | Illumina HS2500     | 1.2ng HMW DNA (>40 kbp)                  | 2X150 PE reads          | Supernova v1.1 And V2.+       |
| Optical genome mapping | Bionano Irys BspQ I | ~10 <sup>7</sup> cells<br>~160ng HMW DNA | >150 kbp molecules      | BNG Assembler v5122           |
| Oxford Nanopore        | R9.1 Flow cell      | 1-2 ug HMW DNA<br>~9X read depth         | N50 ~32 kbp             | LINKS, Pilon                  |
| Hi-C, Arima            | Illumina NS6500     | ~1 M reads                               | 2X150 PE reads          | 3d-dna, Juicebox tools        |
| Optical genome map 2   | Saphyr DLE-1        | ~10 <sup>7</sup> cells<br>~160ng HMW DNA | >150 kbp molecules      | BNG Access                    |
| Synteny analysis       |                     |                                          | NCBI, DNAZoo assemblies | Minimap2, D-GENIES            |
| Manual editing         | Galaxy tools        |                                          |                         |                               |

**Table S2. Assembly sources for species comparisons**

| Common name               | Species                                 | Assembly                           | Source      |
|---------------------------|-----------------------------------------|------------------------------------|-------------|
| Gray Seal                 | <i>Halichoerus grypus</i>               | Halichoerus_grypus_HiC             | DNAZoo      |
| Harbor Seal               | <i>Phoca vitulina</i>                   | GSC_HSeal_1.0_HiC                  | DNAZoo      |
| Bearded Seal              | <i>Erignathus barbatus</i>              | Erignathus_barbatus_HiC            | DNAZoo      |
| N. Elephant Seal          | <i>Mirounga angustirostris</i>          | Mirounga_angustirostris_HiC        | DNAZoo      |
| <b>Hawaiian Monk Seal</b> | <b><i>Neomonachus schauinslandi</i></b> | <b>GCF_002201575.2_ASM220157v2</b> | <b>NCBI</b> |
| Antarctic Fur Seal        | <i>Arctocephalus gazella</i>            | GCA_900642305.1_arcGaz3            | NCBI        |
| Guadalupe Fur Seal        | <i>Arctocephalus townsendi</i>          |                                    | DNAZoo      |
| California Sea Lion       | <i>Zalophus californianus</i>           | GCA_900631625.1_zalCal2.2          | NCBI        |
| Walrus                    | <i>Odobenus rosmarus divergens</i>      | Oros_1.0_HiC                       | DNAZoo      |
| Domestic cat              | <i>Felis catus</i>                      | GCF_000181335.3_Felis_catus_9.0    | NCBI        |
| Domestic dog              | <i>Canis familiaris</i>                 | GCF_000002285.3_CanFam3.1          | NCBI        |

**Table S3. Comparison of NCBI metrics for ASM220157v1 and ASM220157v2.**

| NCBI Global statistic | V1            | V2            |
|-----------------------|---------------|---------------|
| Total ungapped length | 2,347,217,317 | 2,376,537,768 |
| NCBI annotations      |               |               |
| Genes and Pseudogenes | 24,730        | 27,736        |
| Protein coding genes  | 18,856        | 19,838        |
| Exons                 | 204,392       | 212,563       |
| Non-coding            | 1,173         | 3,122         |
| Pseudogenes           | 4,701         | 4,734         |
| mRNAs                 | 28,368        | 34,516        |
| tRNAs                 | 446           | 531           |
| lncRNA                | 824           | 780           |

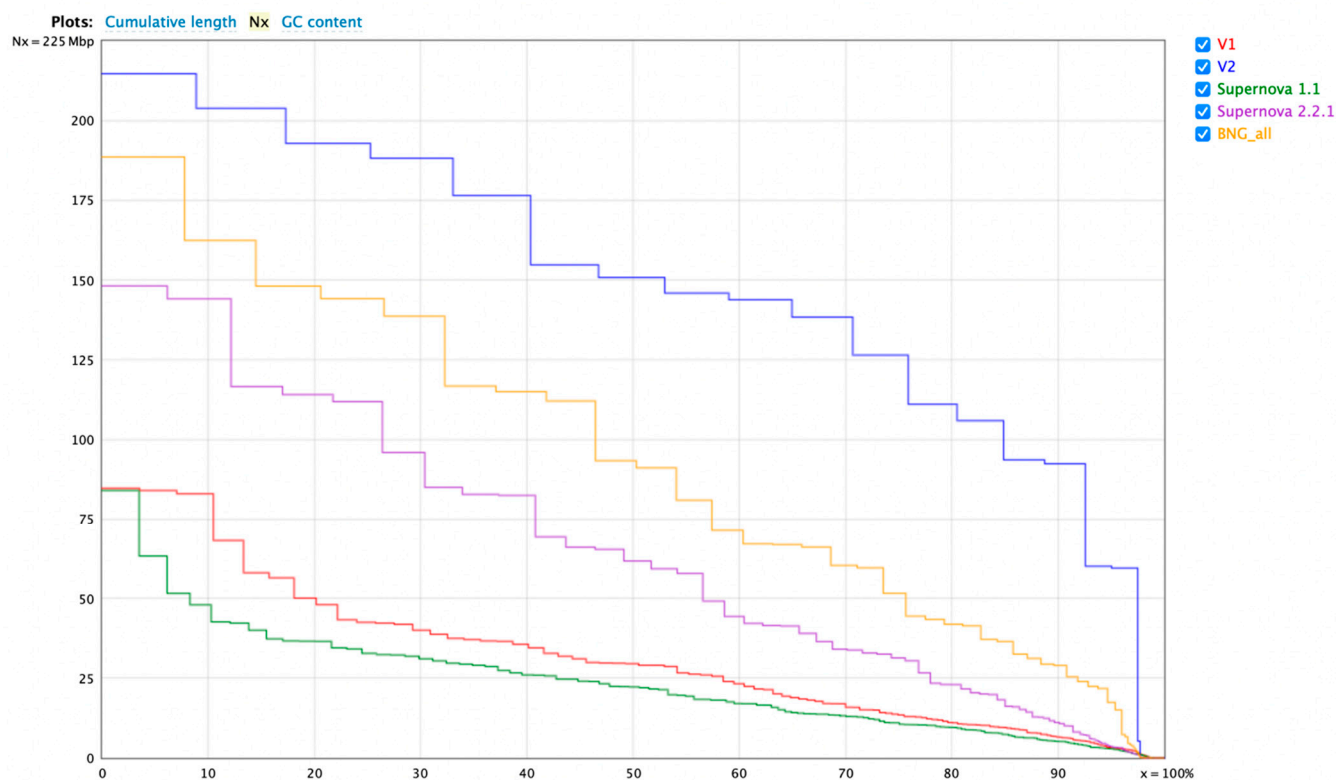

**Figure S1.** Improved assembly contiguity with additional methods. Linked reads with Supernova v1.1, N50=22.23 Mb; ASM220157v1 assembly, N50=29.52 Mb; Supernova 2.2.1 on original linked reads, N50=61.65 Mb; All methods with BNG maps, N50=93.39 Mb; ASM220157v2 assembly, 150.81 Mb.

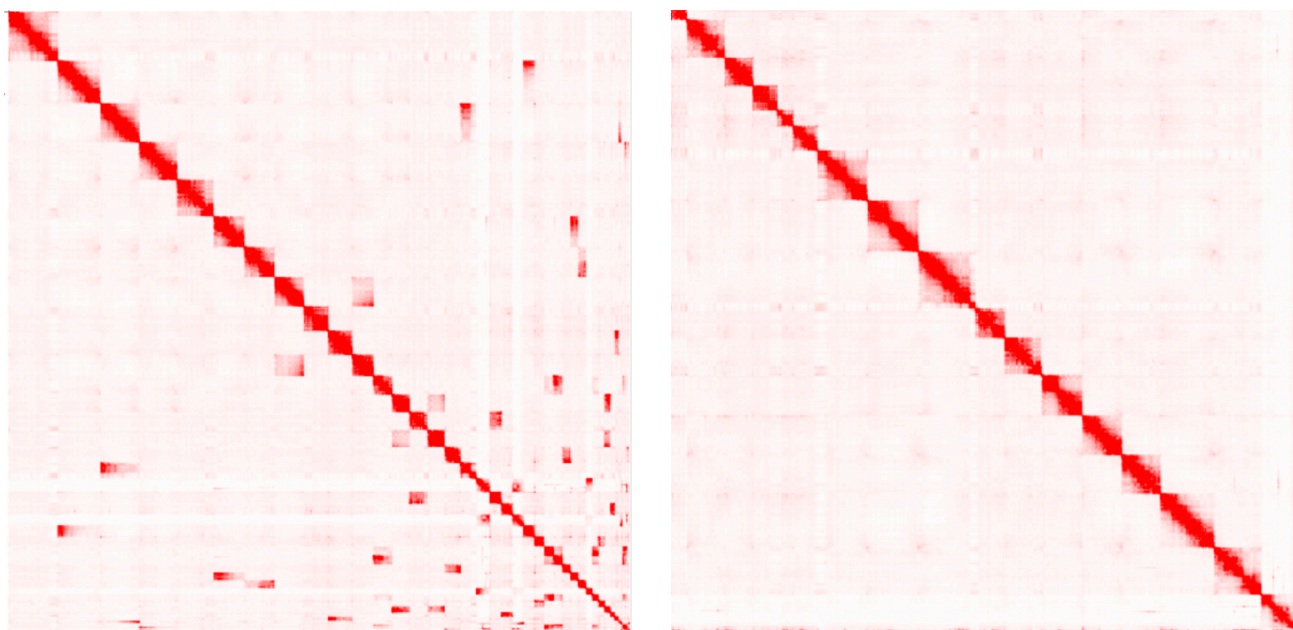

**Figure S2.** Hi-C chromosome-length assembly and Juicebox Assembly Tools polishing. Original plots and data are available at [DNAzoo.org](http://DNAzoo.org).

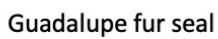

Guadalupe fur seal

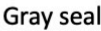

## Gray seal

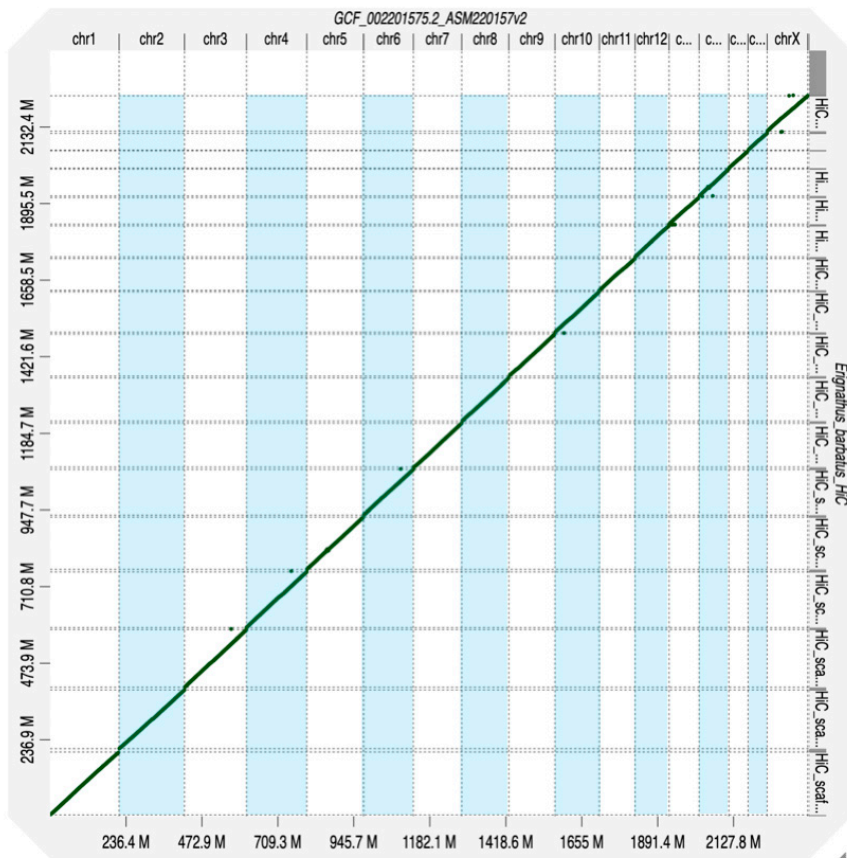

Bearded seal

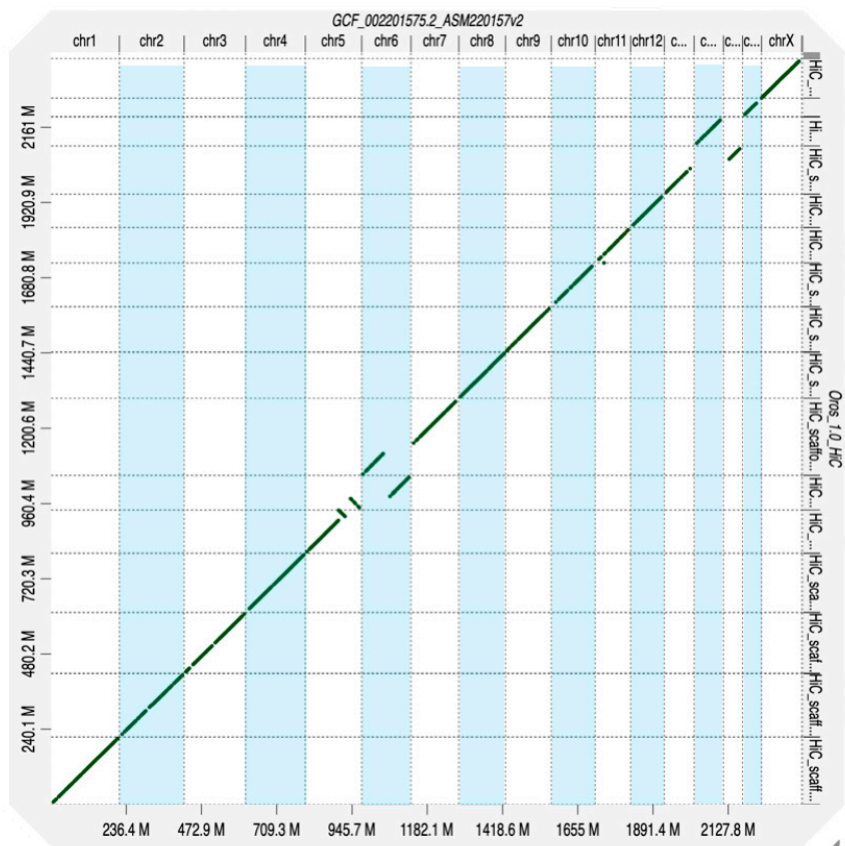

Walrus



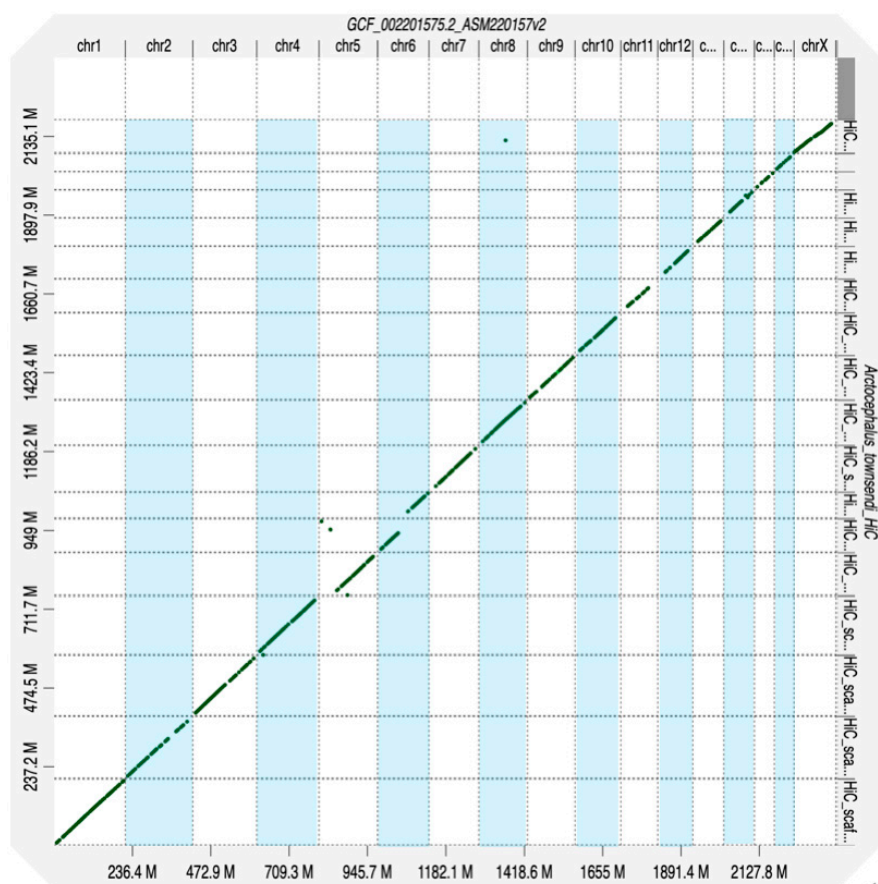

## Antarctic fur seal

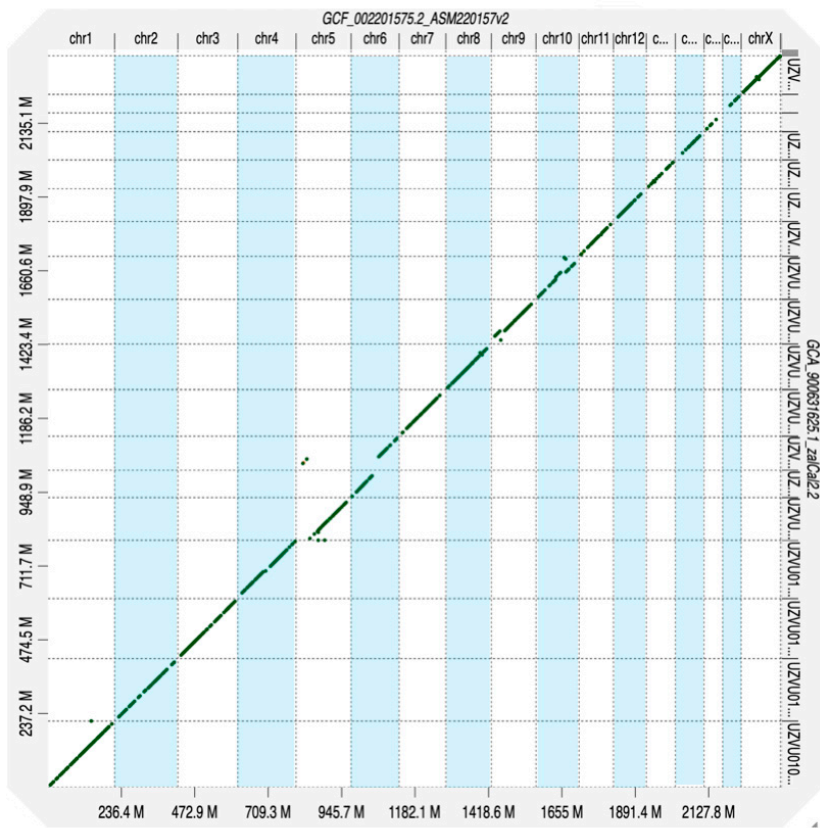

California sea lion

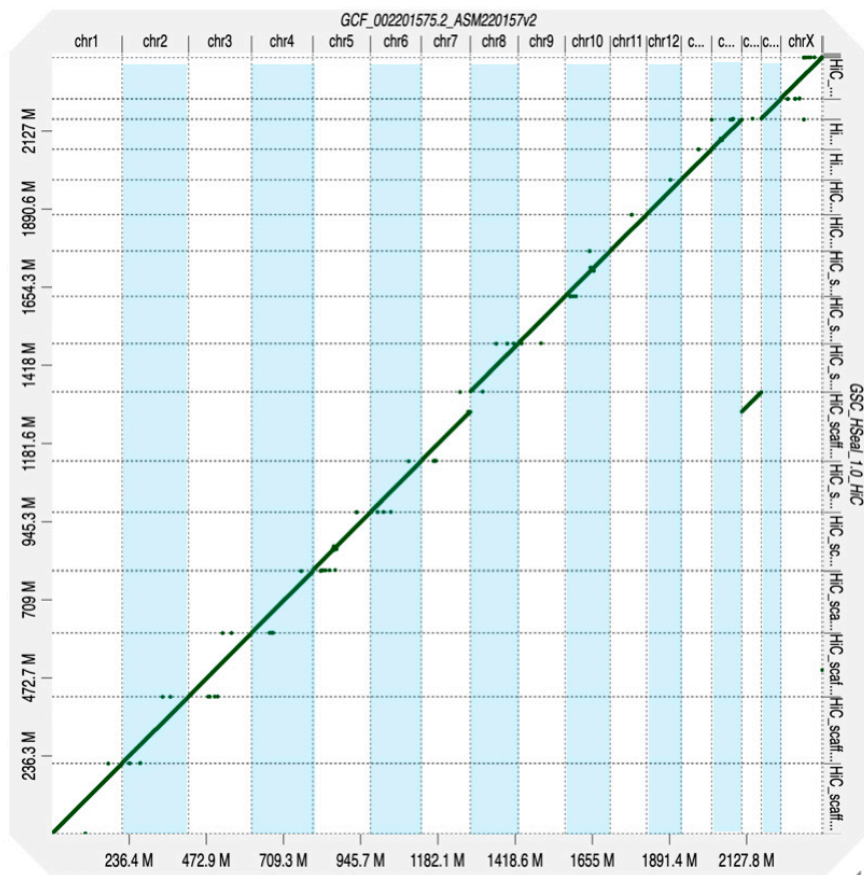

Harbor Seal

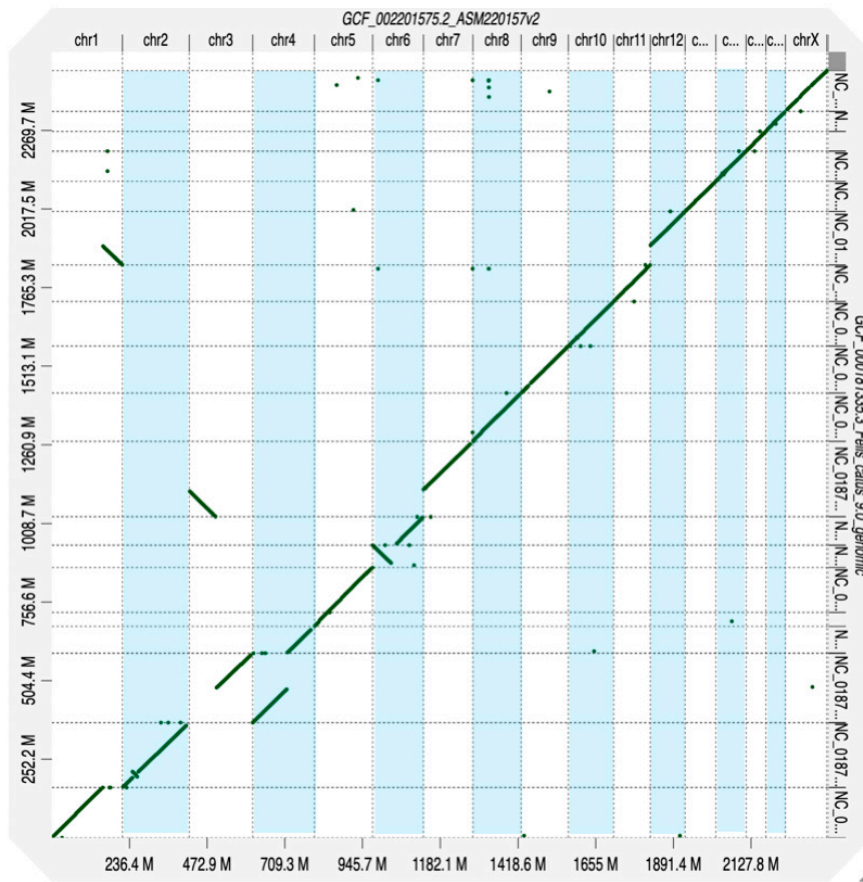

Cat

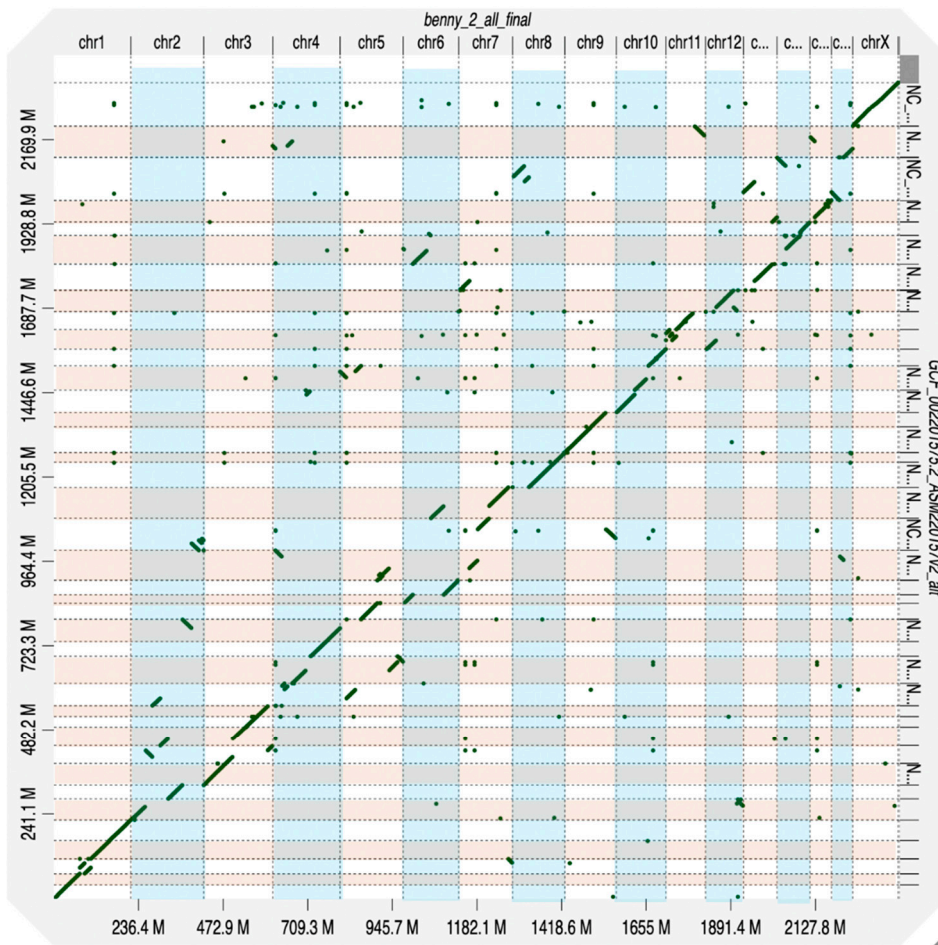

### Dog

Alternate Hawaiian monk seal and dog chromosomes colored.

**Figure S3.** Enlarged DG plots of other species relative to HMS ASM220157v2. Selected chromosomes from other species were reverse-complemented before plotting.

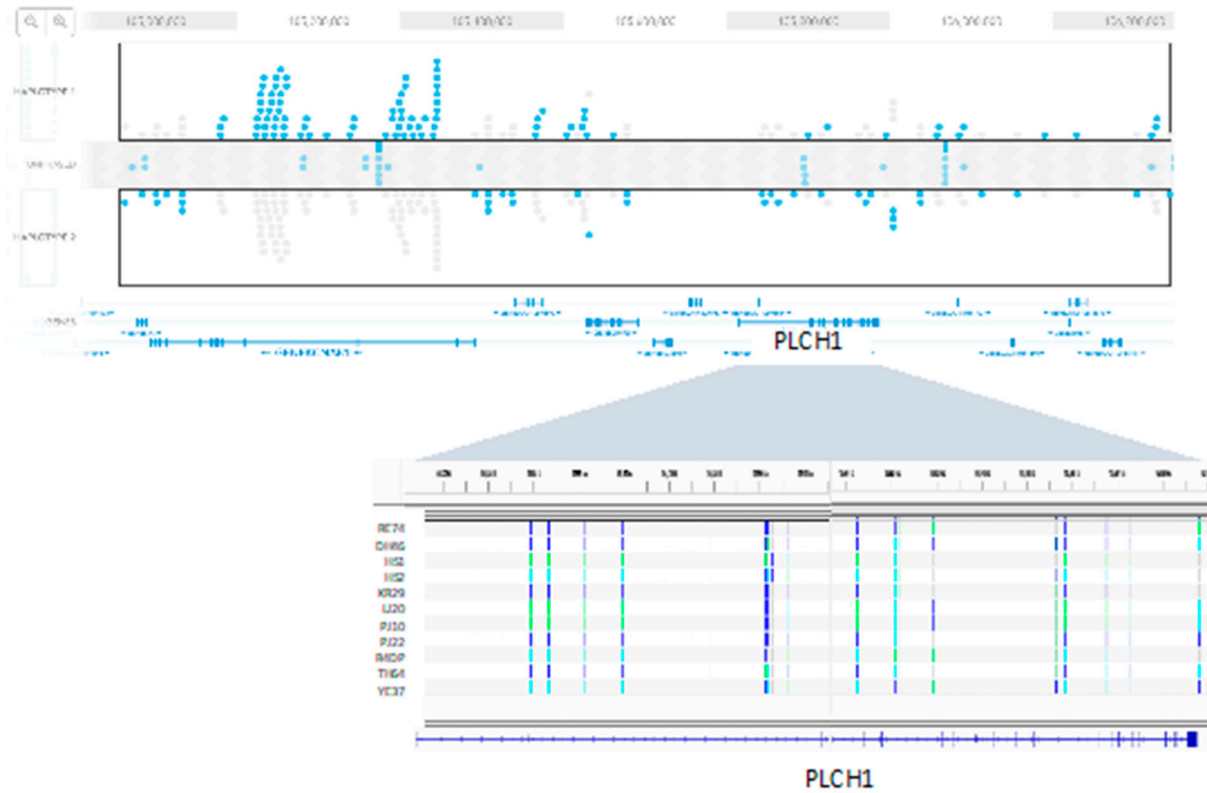

**Figure S4.** A representative 1.28Mb phase block in RE74 including KCNAB1 and PLCH1 shown in the Loupe viewer illustrating lack of heterogeneity among HMS. Alignment of variants in RE74 and 10 other seals within PLCH1. Solid dark blue bars are heterozygous differences from the RE74 reference, light blue are homozygous differences from reference and green bars are homozygous reference.
